# Supplementary material
Source: Research Square preprint supplement (doi:10.21203/rs.3.rs-9555964/v1)
Supplement: Supplementary file 1 [file ec4f10b0805fadfdd345a376.docx]

**Supplementary Table S1A. Overall Mortality and Age-Adjusted Mortality Rate for infectious and parasitic diseases in the U.S from 1999-2023**

| **Year** | **Overall** | **AAMR (95% CI)** |
| --- | --- | --- |
| **1999** | **177751** | 65.0 (64.7–65.3) |
| **2000** | 177753 | 64.1 (63.8–64.4) |
| **2001** | 181475 | 64.4 (64.1–64.7) |
| **2002** | 187313 | 65.5 (65.2–65.8) |
| **2003** | 191678 | 65.9 (65.6–66.2) |
| **2004** | 193037 | 65.3 (65.0–65.6) |
| **2005** | 201675 | 67.0 (66.7–67.3) |
| **2006** | 201846 | 65.8 (65.5–66.0) |
| **2007** | 201650 | 64.3 (64.1–64.6) |
| **2008** | 209210 | 65.4 (65.1–65.6) |
| **2009** | 210548 | 64.5 (64.3–64.8) |
| **2010** | 210972 | 63.6 (63.3–63.8) |
| **2011** | 217268 | 63.7 (63.5–64.0) |
| **2012** | 217967 | 62.4 (62.2–62.7) |
| **2013** | 226582 | 63.5 (63.2–63.7) |
| **2014** | 234605 | 64.3 (64.0–64.5) |
| **2015** | 247878 | 66.4 (66.2–66.7) |
| **2016** | 249614 | 65.7 (65.4–65.9) |
| **2017** | 255671 | 65.7 (65.5–66.0) |
| **2018** | 257662 | 65.0 (64.7–65.2) |
| **2019** | 252540 | 62.6 (62.3–62.8) |
| **2020** | 305736 | 74.5 (74.2–74.7) |
| **2021** | 343215 | 85.1 (84.8–85.4) |
| **2022** | 304031 | 72.6 (72.4–72.9) |
| **2023** | **282605** | 67.0 (66.7–67.3) |
| ***Total*** | ***5740282*** | ***N/A*** |

*Abbreviations: AAMR, Age-Adjusted Mortality Rate; CI, Confidence Interval*

**Supplementary Table S1B. Sex Stratified Mortality and Age-Adjusted Mortality Rate for infectious and parasitic diseases in the U.S from 1999-2023**

| **Year** | **Female Deaths** | **Female AAMR (95% CI)** | **Male Deaths** | **Male AAMR (95% CI)** |
| --- | --- | --- | --- | --- |
| **1999** | **88838** | 54.8 (54.4–55.1) | **88913** | 78.2 (77.7–78.7) |
| **2000** | 88775 | 54.1 (53.8–54.5) | 88978 | 77.0 (76.5–77.5) |
| **2001** | 90683 | 54.6 (54.3–55.0) | 90792 | 76.8 (76.3–77.3) |
| **2002** | 93128 | 55.5 (55.1–55.8) | 94185 | 78.2 (77.7–78.7) |
| **2003** | 95359 | 56.1 (55.7–56.4) | 96319 | 78.4 (77.9–78.9) |
| **2004** | 95682 | 55.6 (55.3–56.0) | 97355 | 77.7 (77.2–78.2) |
| **2005** | 99608 | 56.9 (56.5–57.2) | 102067 | 79.7 (79.2–80.2) |
| **2006** | 99760 | 56.1 (55.7–56.4) | 102086 | 77.9 (77.4–78.4) |
| **2007** | 99382 | 54.9 (54.6–55.3) | 102268 | 76.2 (75.8–76.7) |
| **2008** | 103638 | 56.2 (55.9–56.6) | 105572 | 77.0 (76.5–77.4) |
| **2009** | 103899 | 55.5 (55.2–55.9) | 106649 | 75.9 (75.4–76.4) |
| **2010** | 103693 | 54.5 (54.1–54.8) | 107279 | 75.0 (74.5–75.4) |
| **2011** | 107298 | 55.1 (54.8–55.4) | 109970 | 74.5 (74.1–74.9) |
| **2012** | 106274 | 53.5 (53.2–53.8) | 111693 | 73.6 (73.1–74.0) |
| **2013** | 110482 | 54.6 (54.3–54.9) | 116100 | 74.4 (74.0–74.9) |
| **2014** | 113862 | 55.3 (55.0–55.6) | 120743 | 75.4 (74.9–75.8) |
| **2015** | 119781 | 56.9 (56.6–57.3) | 128097 | 78.2 (77.8–78.6) |
| **2016** | 120583 | 56.5 (56.2–56.8) | 129031 | 77.0 (76.6–77.4) |
| **2017** | 123112 | 56.4 (56.1–56.7) | 132559 | 77.3 (76.9–77.8) |
| **2018** | 123454 | 55.6 (55.3–55.9) | 134208 | 76.6 (76.1–77.0) |
| **2019** | 120280 | 53.4 (53.1–53.8) | 132260 | 73.8 (73.4–74.2) |
| **2020** | 142397 | 62.5 (62.1–62.8) | 163339 | 89.2 (88.8–89.6) |
| **2021** | 158369 | 71.6 (71.3–72.0) | 184846 | 101.4 (100.9–101.9) |
| **2022** | 143516 | 62.1 (61.8–62.4) | 160515 | 86.0 (85.6–86.4) |
| **2023** | **133772** | 57.7 (57.3–58.0) | **148833** | 78.6 (78.2–79.0) |
| ***Total*** | **2785625** | **N/A** | **2954657** | **N/A** |

*Abbreviations: AAMR, Age-Adjusted Mortality Rate; CI, Confidence Interval; N/A, Not Applicable*

**Supplementary Table S1C. Annual Percent Change (APC) and Average APC (AAPC) in infectious and parasitic diseases from 1999-2023 – Overall and Stratified by Sex**

| **APC** |  |  |  |  |  |  |  |  |
| --- | --- | --- | --- | --- | --- | --- | --- | --- |
| **Cohort** | **Segment** | **Lower Endpoint** | **Upper Endpoint** | **APC** | **Lower CI** | **Upper CI** | **Test Statistic (t)** | **Prob > |t|** |
| Overall | 1 | 1999 | 2018 | -0.172 | -0.3703 | 0.0268 | -1.826 | 0.085464 |
| Overall | 2 | 2018 | 2021 | 8.9189* | 3.6581 | 14.4467 | 3.641 | 0.002021 |
| Overall | 3 | 2021 | 2023 | -10.2743* | -14.4955 | -5.8448 | -4.7467 | 0.000187 |
| Female | 1 | 1999 | 2018 | -0.0356 | -0.1867 | 0.1157 | -0.4965 | 0.625884 |
| Female | 2 | 2018 | 2021 | 7.8269* | 2.6369 | 13.2793 | 3.223 | 0.004994 |
| Female | 3 | 2021 | 2023 | -8.9047* | -13.1202 | -4.4848 | -4.1531 | 0.000666 |
| Male | 1 | 1999 | 2018 | -0.2349* | -0.4259 | -0.0436 | -2.5899 | 0.019074 |
| Male | 2 | 2018 | 2021 | 9.6449* | 4.2278 | 15.3436 | 3.8341 | 0.001329 |
| Male | 3 | 2021 | 2023 | -11.1570* | -15.461 | -6.6339 | -5.0262 | 0.000104 |
| **AAPC** |  |  |  |  |  |  |  |  |
| **Cohort** | **Range** | **Lower Endpoint** | **Upper Endpoint** | **AAPC** | **Lower CI** | **Upper CI** | **Test Statistic~** | **P-Value~** |
| Overall | Full Range | 1999 | 2023 | 0.0282 | -0.6703 | 0.7316 | 0.0789 | 0.937112 |
| Female | Full Range | 1999 | 2023 | 0.1367 | -0.5511 | 0.8292 | 0.3884 | 0.697724 |
| Male | Full Range | 1999 | 2023 | -0.0211 | -0.7352 | 0.6982 | -0.0576 | 0.954063 |

*Abbreviations: CI, confidence interval*

** Indicates that the APC/AAPC significantly differs from zero at the alpha = 0.05 level.*

**Supplementary Table S2A: Race-Stratified Age-Adjusted Mortality Rates for infectious and parasitic diseases in the United States, 1999–2023**

| **AAMR (95% CI)** | | | | | |
| --- | --- | --- | --- | --- | --- |
| **Year** | **Hispanic or Latino** | **American Indian or Alaska Native** | **NH Asian or Pacific Islander** | **NH Black or African American** | **NH White** |
| **1999** | 72.7 (71.2–74.1) | 78.5 (73.2–83.7) | 51.3 (49.4–53.1) | 141.0 (139.5–142.5) | 55.3 (55.0–55.6) |
| **2000** | 69.1 (67.8–70.5) | 71.8 (67.0–76.6) | 47.9 (46.2–49.6) | 139.3 (137.8–140.8) | 54.8 (54.5–55.1) |
| **2001** | 70.4 (69.0–71.7) | 72.5 (67.8–77.2) | 47.3 (45.7–49.0) | 137.8 (136.3–139.2) | 55.2 (54.9–55.5) |
| **2002** | 70.2 (68.9–71.5) | 75.9 (71.1–80.6) | 48.5 (46.9–50.1) | 137.2 (135.8–138.7) | 56.5 (56.2–56.8) |
| **2003** | 69.8 (68.5–71.1) | 82.5 (77.7–87.4) | 47.0 (45.4–48.5) | 135.2 (133.8–136.6) | 57.3 (57.0–57.6) |
| **2004** | 69.2 (68.0–70.4) | 77.4 (72.8–82.0) | 46.8 (45.3–48.3) | 131.8 (130.4–133.2) | 57.1 (56.8–57.4) |
| **2005** | 71.1 (69.9–72.3) | 81.8 (77.0–86.6) | 47.6 (46.2–49.1) | 131.9 (130.5–133.3) | 59.0 (58.7–59.3) |
| **2006** | 68.6 (67.5–69.8) | 77.9 (73.3–82.5) | 48.1 (46.7–49.5) | 128.0 (126.7–129.3) | 57.9 (57.6–58.2) |
| **2007** | 66.9 (65.8–68.0) | 84.3 (79.7–89.0) | 46.5 (45.1–47.8) | 123.9 (122.6–125.2) | 56.9 (56.6–57.2) |
| **2008** | 67.2 (66.1–68.3) | 88.7 (84.0–93.4) | 48.1 (46.7–49.4) | 120.3 (119.1–121.6) | 58.6 (58.3–58.9) |
| **2009** | 65.5 (64.5–66.6) | 94.5 (89.6–99.3) | 45.6 (44.3–46.9) | 115.4 (114.2–116.6) | 58.3 (58.0–58.5) |
| **2010** | 64.6 (63.6–65.6) | 87.5 (82.9–92.1) | 45.6 (44.4–46.9) | 110.8 (109.6–112.0) | 57.8 (57.5–58.0) |
| **2011** | 63.5 (62.5–64.5) | 88.4 (84.0–92.9) | 44.1 (43.0–45.3) | 107.9 (106.7–109.1) | 58.5 (58.2–58.8) |
| **2012** | 61.8 (60.8–62.7) | 88.3 (83.9–92.6) | 43.7 (42.6–44.8) | 102.6 (101.5–103.7) | 57.6 (57.3–57.9) |
| **2013** | 61.7 (60.8–62.6) | 89.6 (85.4–93.9) | 43.8 (42.7–44.9) | 104.3 (103.2–105.4) | 58.8 (58.5–59.1) |
| **2014** | 61.4 (60.5–62.3) | 93.5 (89.3–97.7) | 41.9 (40.9–42.9) | 102.4 (101.3–103.5) | 60.1 (59.8–60.4) |
| **2015** | 61.4 (60.6–62.3) | 95.1 (90.9–99.2) | 42.3 (41.3–43.3) | 104.3 (103.2–105.4) | 62.5 (62.2–62.8) |
| **2016** | 60.7 (59.9–61.5) | 94.4 (90.3 – 98.4) | 42.2 (41.2–43.2) | 102.0 (100.9–103.0) | 62.0 (61.7–62.3) |
| **2017** | 61.2 (60.4–62.0) | 98.1 (94.0–102.1) | 42.4 (41.5–43.4) | 100.0 (99.0–101.0) | 62.3 (62.0–62.6) |
| **2018** | 59.7 (58.9–60.5) | 90.5 (86.7–94.4) | 40.6 (39.6–41.5) | 99.2 (98.2–100.2) | 61.8 (61.5–62.1) |
| **2019** | 56.6 (55.9–57.4) | 86.0 (82.3–89.6) | 39.7 (38.8–40.5) | 94.1 (93.1–95.0) | 59.9 (59.6–60.2) |
| **2020** | 80.9 (80.0–81.8) | 118.3 (114.1–122.5) | 49.7 (48.7–50.6) | 119.9 (118.9–121.0) | 67.9 (67.6–68.2) |
| **2021** | 87.0 (86.1–87.9) | 135.7 (131.0–140.4) | 51.7 (50.7–52.7) | 130.6 (129.5–131.8) | 79.9 (79.5–80.2) |
| **2022** | 67.3 (66.5–68.0) | 114.0 (109.8–118.3) | 44.6 (43.7–45.5) | 112.0 (111.0–113.0) | 69.5 (69.2–69.8) |
| **2023** | 60.2 (59.4–60.9) | 96.2 (92.4–100.1) | 42.6 (41.7–43.4) | 99.3 (98.3–100.3) | 64.8 (64.5–65.0) |

*Abbreviations: AAMR, Age-Adjusted Mortality Rate; CI, Confidence Interval*

**Supplementary Table S2B. Annual Percent Change (APC) and Average APC (AAPC) in infectious and parasitic diseases from 1999-2023 – Stratified by Race**

| **APC** | | | | | | | | |
| --- | --- | --- | --- | --- | --- | --- | --- | --- |
| **Cohort** | **Segment** | **Lower Endpoint** | **Upper Endpoint** | **APC** | **Lower CI** | **Upper CI** | **Test Statistic (t)** | **Prob > |t|** |
| Hispanic or Latino | 1 | 1999 | 2018 | -1.1424* | -1.2891 | -0.9955 | -16.3264 | < 0.000001 |
| Hispanic or Latino | 2 | 2018 | 2021 | 13.7336* | 9.5617 | 18.0644 | 7.2653 | 0.000001 |
| Hispanic or Latino | 3 | 2021 | 2023 | -17.9452* | -21.0543 | -14.7137 | -10.803 | < 0.000001 |
| American Indian or Alaska Native | 1 | 1999 | 2018 | 1.1324* | 0.7988 | 1.4672 | 7.1887 | 0.000002 |
| American Indian or Alaska Native | 2 | 2018 | 2021 | 11.5760* | 2.8101 | 21.0893 | 2.8244 | 0.011689 |
| American Indian or Alaska Native | 3 | 2021 | 2023 | -14.0644* | -20.8217 | -6.7305 | -3.9049 | 0.00114 |
| Asian or Pacific Islander | 1 | 1999 | 2018 | -1.1387* | -1.3318 | -0.9453 | -12.3616 | < 0.000001 |
| Asian or Pacific Islander | 2 | 2018 | 2021 | 7.7857* | 2.9765 | 12.8194 | 3.4656 | 0.002956 |
| Asian or Pacific Islander | 3 | 2021 | 2023 | -9.1820* | -13.3412 | -4.8232 | -4.3346 | 0.00045 |
| Black or African American | 1 | 1999 | 2018 | -2.1871* | -2.4095 | -1.9642 | -20.4964 | < 0.000001 |
| Black or African American | 2 | 2018 | 2021 | 10.6251* | 3.1887 | 18.5974 | 3.0615 | 0.007063 |
| Black or African American | 3 | 2021 | 2023 | -12.5416* | -18.3994 | -6.2631 | -4.0782 | 0.000783 |
| White | 1 | 1999 | 2023 | 0.8977* | 0.5198 | 1.277 | 4.9273 | 0.000056 |
| **AAPC** | | | | | | | | |
| **Cohort** | **Range** | **Lower Endpoint** | **Upper Endpoint** | **AAPC** | **Lower CI** | **Upper CI** | **Test Statistic~** | **P-Value~** |
| Hispanic or Latino | Full Range | 1999 | 2023 | -0.9447* | -1.4764 | -0.4101 | -3.4566 | 0.000547 |
| American Indian or Alaska Native | Full Range | 1999 | 2023 | 1.0026 | -0.1701 | 2.189 | 1.6742 | 0.094083 |
| Asian or Pacific Islander | Full Range | 1999 | 2023 | -0.7691* | -1.4202 | -0.1138 | -2.2989 | 0.02151 |
| Black or African American | Full Range | 1999 | 2023 | -1.5924* | -2.5563 | -0.6189 | -3.196 | 0.001393 |
| White | Full Range | 1999 | 2023 | 0.8977* | 0.5198 | 1.277 | 4.9273 | 0.000056 |

*Abbreviations: CI, confidence interval*

** Indicates that the APC/AAPC significantly differs from zero at the alpha = 0.05 level.*

**Supplementary Table S3A: Age-Adjusted Mortality Rates per 100,000 for infectious and parasitic diseases in the United States from 1999–2023, stratified by Age**

| **AAMR (95% CI)** | | | | | |  |  |  |  |  |  |  |
| --- | --- | --- | --- | --- | --- | --- | --- | --- | --- | --- | --- | --- |
| **Year** | **0-4 years** | **5-24 years** | **25-44 years** | **45-64 years** | **65-85+ years** |  |  |  |  |  |  |  |
| **1999** | 9.2 (8.8–9.7) | 2.3 (2.2–2.4) | 21.4 (21.1–21.7) | 60.6 (60.0–61.2) | 346.9 (344.9–348.8) |  |  |  |  |  |  |  |
| **2000** | 8.3 (7.9–8.7) | 2.2 (2.1–2.3) | 20.3 (20.0–20.6) | 62.2 (61.6–62.9) | 340.9 (339.0–342.9) |  |  |  |  |  |  |  |
| **2001** | 8.6 (8.2–9.0) | 2.1 (2.0–2.2) | 19.9 (19.6–20.2) | 63.3 (62.6–63.9) | 341.7 (339.7–343.6) |  |  |  |  |  |  |  |
| **2002** | 8.3 (7.9–8.7) | 2.2 (2.1–2.3) | 19.7 (19.4–20.0) | 64.8 (64.2–65.5) | 348.2 (346.3–350.2) |  |  |  |  |  |  |  |
| **2003** | 8.0 (7.6–8.4) | 2.1 (2.0–2.2) | 19.2 (18.9–19.5) | 66.9 (66.2–67.5) | 349.5 (347.5–351.4) |  |  |  |  |  |  |  |
| **2004** | 8.0 (7.6–8.4) | 2.0 (1.9–2.1) | 18.0 (17.7–18.3) | 67.2 (66.6–67.8) | 347.4 (345.5–349.4) |  |  |  |  |  |  |  |
| **2005** | 8.4 (8.0–8.8) | 2.0 (1.9–2.1) | 17.3 (17.1–17.6) | 68.4 (67.8–69.0) | 360.0 (358.1–361.9) |  |  |  |  |  |  |  |
| **2006** | 7.6 (7.2–8.0) | 2.1 (2.0–2.2) | 16.4 (16.1–16.7) | 68.1 (67.5–68.7) | 353.1 (351.2–355.0) |  |  |  |  |  |  |  |
| **2007** | 7.6 (7.2–8.0) | 2.0 (1.9–2.1) | 15.2 (14.9–15.5) | 67.3 (66.7–67.9) | 346.5 (344.6–348.3) |  |  |  |  |  |  |  |
| **2008** | 7.3 (6.9–7.6) | 1.8 (1.7–1.9) | 14.3 (14.0–14.5) | 68.5 (68.0–69.1) | 355.0 (353.2–356.9) |  |  |  |  |  |  |  |
| **2009** | 7.9 (7.5–8.3) | 1.9 (1.8–2.0) | 14.2 (13.9–14.4) | 68.1 (67.6–68.7) | 348.9 (347.1–350.7) |  |  |  |  |  |  |  |
| **2010** | 7.6 (7.2–8.0) | 1.8 (1.7–1.9) | 12.5 (12.2–12.7) | 67.0 (66.5–67.6) | 347.5 (345.7–349.3) |  |  |  |  |  |  |  |
| **2011** | 6.5 (6.2–6.9) | 1.7 (1.6–1.8) | 12.4 (12.1–12.6) | 67.9 (67.4–68.5) | 348.3 (346.5–350.1) |  |  |  |  |  |  |  |
| **2012** | 6.6 (6.3–7.0) | 1.6 (1.5–1.7) | 11.7 (11.4–11.9) | 67.8 (67.2–68.3) | 340.2 (338.4–341.9) |  |  |  |  |  |  |  |
| **2013** | 6.3 (6.0–6.7) | 1.6 (1.5–1.7) | 11.8 (11.5–12.0) | 69.1 (68.5–69.6) | 346.0 (344.2–347.7) |  |  |  |  |  |  |  |
| **2014** | 6.2 (5.8–6.5) | 1.7 (1.6–1.8) | 11.9 (11.6–12.1) | 70.7 (70.2–71.3) | 348.8 (347.0–350.5) |  |  |  |  |  |  |  |
| **2015** | 6.7 (6.3–7.0) | 1.7 (1.6–1.8) | 11.9 (11.7–12.2) | 70.7 (70.1–71.3) | 366.0 (364.2–367.7) |  |  |  |  |  |  |  |
| **2016** | 7.2 (6.9–7.6) | 1.9 (1.8–2.0) | 12.3 (12.1–12.6) | 70.1 (69.6–70.7) | 358.9 (357.2–360.7) |  |  |  |  |  |  |  |
| **2017** | 6.5 (6.1–6.8) | 1.6 (1.5–1.7) | 12.1 (11.9–12.3) | 68.7 (68.2–69.3) | 363.6 (361.9–365.3) |  |  |  |  |  |  |  |
| **2018** | 6.4 (6.0–6.8) | 1.6 (1.5–1.7) | 12.3 (12.0–12.5) | 67.7 (67.2–68.2) | 359.0 (357.3–360.6) |  |  |  |  |  |  |  |
| **2019** | 6.7 (6.3–7.1) | 1.6 (1.6–1.7) | 12.3 (12.1–12.5) | 65.4 (64.9–65.9) | 343.7 (342.1–345.3) |  |  |  |  |  |  |  |
| **2020** | 5.8 (5.4–6.1) | 1.6 (1.5–1.7) | 15.5 (15.2–15.8) | 80.8 (80.2–81.4) | 403.8 (402.1–405.5) |  |  |  |  |  |  |  |
| **2021** | 6.9 (6.5–7.2) | 1.9 (1.8–2.0) | 20.0 (19.7–20.3) | 95.1 (94.5–95.8) | 450.9 (449.1–452.8) |  |  |  |  |  |  |  |
| **2022** | 7.8 (7.4–8.2) | 1.8 (1.7–1.9) | 15.5 (15.2–15.8) | 76.2 (75.6–76.8) | 396.0 (394.3–397.7) |  |  |  |  |  |  |  |
| **2023** | 8.5 (8.1–8.9) | 1.8 (1.7–1.9) | 13.7 (13.5–14.0) | 66.7 (66.2–67.2) | 371.7 (370.1–373.4) |  |  |  |  |  |  |  |

*Abbreviations: AAMR, Age-Adjusted Mortality Rate; CI, Confidence Interval*

** The relevant data was not available on the CDC Wonder site.*

**Supplementary Table S3B. Annual Percent Change (APC) and Average APC (AAPC) in infectious and parasitic diseases from 1999-2023 – Stratified by Age group**

| **APC** | | | | | | | | |
| --- | --- | --- | --- | --- | --- | --- | --- | --- |
| **Cohort** | **Segment** | **Lower Endpoint** | **Upper Endpoint** | **APC** | **Lower CI** | **Upper CI** | **Test Statistic (t)** | **Prob > |t|** |
| 0-4 years | 1 | 1999 | 2020 | -1.7093* | -2.0886 | -1.3284 | -9.3002 | < 0.000001 |
| 0-4 years | 2 | 2020 | 2023 | 11.9424* | 3.922 | 20.5817 | 3.1654 | 0.004865 |
| 5-24 years | 1 | 1999 | 2013 | -2.4028* | -3.4933 | -1.3 | -4.5153 | 0.000211 |
| 5-24 years | 2 | 2013 | 2023 | 0.8055 | -0.3662 | 1.991 | 1.4313 | 0.167778 |
| 25-44 years | 1 | 1999 | 2012 | -4.7385* | -5.2316 | -4.2427 | -20.0601 | < 0.000001 |
| 25-44 years | 2 | 2012 | 2018 | -0.2053 | -2.329 | 1.9646 | -0.2049 | 0.840604 |
| 25-44 years | 3 | 2018 | 2021 | 15.4351* | 6.0749 | 25.6213 | 3.6406 | 0.002674 |
| 25-44 years | 4 | 2021 | 2023 | -13.5879* | -20.1815 | -6.4496 | -3.9463 | 0.001462 |
| 45-64 years | 1 | 1999 | 2018 | 0.3667* | 0.1645 | 0.5693 | 3.8289 | 0.001344 |
| 45-64 years | 2 | 2018 | 2021 | 9.5331* | 2.8614 | 16.6376 | 3.057 | 0.007132 |
| 45-64 years | 3 | 2021 | 2023 | -14.9108* | -20.1583 | -9.3185 | -5.352 | 0.000053 |
| 65-85+ years | 1 | 1999 | 2018 | 0.0918 | -0.0741 | 0.2579 | 1.1666 | 0.259478 |
| 65-85+ years | 2 | 2018 | 2021 | 7.3672* | 2.4153 | 12.5586 | 3.1762 | 0.005523 |
| 65-85+ years | 3 | 2021 | 2023 | -8.0003* | -12.1244 | -3.6827 | -3.836 | 0.001323 |
| **AAPC** | | | | | | | | |
| **Cohort** | **Range** | **Lower Endpoint** | **Upper Endpoint** | **AAPC** | **Lower CI** | **Upper CI** | **Test Statistic~** | **P-Value~** |
| 0-4 years | Full Range | 1999 | 2023 | -0.0983 | -1.0223 | 0.8343 | -0.2074 | 0.835662 |
| 5-24 years | Full Range | 1999 | 2023 | -1.0786* | -1.8348 | -0.3167 | -2.7701 | 0.005604 |
| 25-44 years | Full Range | 1999 | 2023 | -2.0817* | -3.3147 | -0.8329 | -3.2535 | 0.00114 |
| 45-64 years | Full Range | 1999 | 2023 | 0.0824 | -0.8073 | 0.9801 | 0.1808 | 0.856534 |
| 65-85+ years | Full Range | 1999 | 2023 | 0.2666 | -0.3974 | 0.9351 | 0.7854 | 0.432215 |

*Abbreviations: CI, confidence interval*

** Indicates that the APC/AAPC significantly differs from zero at the alpha = 0.05 level.*

**Supplementary Table S4A: Age-Adjusted Mortality Rates per 100,000 for infectious and parasitic diseases in the United States from 1999–2020, stratified by Urbanization**

|  | **AAMR (95% CI)** | |
| --- | --- | --- |
| **Year** | **Metropolitan (Urban)** | **Non-metropolitan (Rural)** |
| **1999** | 66.7 (66.3–67.0) | 56.9 (56.3–57.6) |
| **2000** | 65.9 (65.6–66.2) | 56.1 (55.4–56.7) |
| **2001** | 65.8 (65.5–66.1) | 57.7 (57.1–58.4) |
| **2002** | 66.9 (66.6–67.3) | 58.6 (57.9–59.3) |
| **2003** | 67.1 (66.8–67.5) | 60.0 (59.3–60.6) |
| **2004** | 66.7 (66.3–67.0) | 59.0 (58.4–59.7) |
| **2005** | 68.1 (67.8–68.4) | 61.6 (60.9–62.2) |
| **2006** | 66.9 (66.5–67.2) | 60.3 (59.6–61.0) |
| **2007** | 65.3 (64.9–65.6) | 60.1 (59.4–60.7) |
| **2008** | 66.0 (65.7–66.3) | 62.5 (61.8–63.2) |
| **2009** | 64.9 (64.6–65.2) | 63.2 (62.5–63.8) |
| **2010** | 63.8 (63.5–64.1) | 62.5 (61.8–63.1) |
| **2011** | 63.7 (63.4–64.0) | 64.1 (63.4–64.7) |
| **2012** | 62.2 (61.9–62.5) | 63.6 (63.0–64.3) |
| **2013** | 63.1 (62.8–63.3) | 65.9 (65.2–66.5) |
| **2014** | 63.6 (63.3–63.9) | 67.8 (67.1–68.5) |
| **2015** | 65.4 (65.1–65.7) | 72.2 (71.5–72.9) |
| **2016** | 64.5 (64.2–64.8) | 71.9 (71.2–72.5) |
| **2017** | 64.5 (64.2–64.8) | 72.5 (71.8–73.2) |
| **2018** | 63.6 (63.3–63.8) | 72.6 (71.9–73.3) |
| **2019** | 60.9 (60.7–61.2) | 71.3 (70.6–71.9) |
| **2020** | 73.0 (72.7–73.3) | 82.9 (82.2–83.7) |

*Abbreviations: AAMR, Age-Adjusted Mortality Rate; CI, Confidence Interval*

**Supplementary Table S4B. Annual Percent Change (APC) and Average APC (AAPC) in infectious and parasitic diseases from 1999-2023 – Stratified by urbanization**

| **APC** | | | | | | | | |
| --- | --- | --- | --- | --- | --- | --- | --- | --- |
| **Cohort** | **Segment** | **Lower Endpoint** | **Upper Endpoint** | **APC** | **Lower CI** | **Upper CI** | **Test Statistic (t)** | **Prob > |t|** |
| Metropolitan | 1 | 1999 | 2020 | -0.0028 | -0.3746 | 0.3704 | -0.0155 | 0.987806 |
| Non-metropolitan | 1 | 1999 | 2020 | 1.4731* | 1.2382 | 1.7085 | 13.164 | < 0.000001 |
| **AAPC** | | | | | | | | |
| **Cohort** | **Range** | **Lower Endpoint** | **Upper Endpoint** | **AAPC** | **Lower CI** | **Upper CI** | **Test Statistic~** | **P-Value~** |
| Metropolitan | Full Range | 1999 | 2020 | -0.0028 | -0.3746 | 0.3704 | -0.0155 | 0.987806 |
| Non-metropolitan | Full Range | 1999 | 2020 | 1.4731* | 1.2382 | 1.7085 | 13.164 | < 0.000001 |

*Abbreviations: CI, confidence interval*

** Indicates that the APC/AAPC significantly differs from zero at the alpha = 0.05 level.*

**Supplementary Table S5A: Age-Adjusted Mortality Rates per 100,000 for infectious and parasitic diseases in the United States from 1999–2023, stratified by Census Region**

|  | **AAMR (95% CI)** | | | |
| --- | --- | --- | --- | --- |
| **Year** | **Northeast** | **Midwest** | **South** | **West** |
| **1999** | 71.2 (70.5–71.9) | 56.1 (55.5–56.7) | 72.8 (72.2–73.3) | 55.2 (54.6–55.8) |
| **2000** | 70.9 (70.2–71.6) | 54.9 (54.3–55.4) | 72.3 (71.8–72.9) | 53.7 (53.1–54.3) |
| **2001** | 70.5 (69.9–71.2) | 54.9 (54.3–55.4) | 72.8 (72.2–73.3) | 54.5 (53.9–55.1) |
| **2002** | 70.5 (69.8–71.2) | 56.4 (55.9–57.0) | 74.0 (73.5–74.6) | 55.8 (55.2–56.4) |
| **2003** | 69.1 (68.4–69.8) | 56.8 (56.2–57.4) | 74.7 (74.2–75.3) | 57.7 (57.1–58.3) |
| **2004** | 70.0 (69.3–70.7) | 55.7 (55.2–56.3) | 73.5 (73.0–74.0) | 57.2 (56.6–57.8) |
| **2005** | 71.4 (70.8–72.1) | 58.5 (57.9–59.0) | 74.9 (74.4–75.4) | 58.1 (57.5–58.7) |
| **2006** | 69.2 (68.5–69.8) | 57.1 (56.5–57.7) | 73.4 (72.9–73.9) | 58.5 (57.9–59.1) |
| **2007** | 67.0 (66.3–67.6) | 56.8 (56.2–57.3) | 71.6 (71.1–72.1) | 57.3 (56.7–57.9) |
| **2008** | 66.6 (66.0–67.3) | 58.9 (58.3–59.4) | 72.3 (71.8–72.8) | 59.2 (58.6–59.7) |
| **2009** | 63.9 (63.2–64.5) | 57.7 (57.2–58.3) | 71.9 (71.4–72.4) | 59.6 (59.0–60.2) |
| **2010** | 63.9 (63.2–64.5) | 56.8 (56.2–57.3) | 69.8 (69.3–70.3) | 59.5 (58.9–60.1) |
| **2011** | 63.9 (63.3–64.5) | 58.4 (57.9–58.9) | 69.1 (68.7–69.6) | 59.6 (59.1–60.2) |
| **2012** | 61.4 (60.8–62.0) | 56.4 (55.9–56.9) | 68.8 (68.3–69.2) | 58.6 (58.0–59.1) |
| **2013** | 62.6 (62.0–63.2) | 56.7 (56.2–57.3) | 70.1 (69.6–70.5) | 59.6 (59.1–60.2) |
| **2014** | 63.0 (62.4–63.6) | 58.1 (57.6–58.7) | 71.1 (70.6–71.5) | 59.6 (59.1–60.1) |
| **2015** | 64.0 (63.4–64.6) | 60.7 (60.2–61.3) | 73.8 (73.4–74.3) | 61.4 (60.9–62.0) |
| **2016** | 62.0 (61.4–62.6) | 59.4 (58.9–60.0) | 73.2 (72.8–73.7) | 61.8 (61.3–62.4) |
| **2017** | 60.1 (59.5–60.6) | 60.2 (59.7–60.8) | 73.9 (73.5–74.4) | 61.8 (61.3–62.3) |
| **2018** | 59.9 (59.3–60.5) | 60.6 (60.1–61.1) | 73.2 (72.7–73.6) | 59.2 (58.7–59.8) |
| **2019** | 58.0 (57.5–58.6) | 58.8 (58.3–59.4) | 70.0 (69.6–70.4) | 56.9 (56.4–57.4) |
| **2020** | 69.0 (68.4–69.6) | 70.9 (70.3–71.5) | 83.0 (82.5–83.5) | 67.5 (67.0–68.1) |
| **2021** | 72.7 (72.1–73.3) | 78.8 (78.2–79.4) | 98.5 (98.0–99.0) | 78.2 (77.6–78.7) |
| **2022** | 66.1 (65.6–66.7) | 67.7 (67.2–68.3) | 81.0 (80.6–81.5) | 68.1 (67.6–68.6) |
| **2023** | 62.5 (61.9–63.1) | 63.3 (62.8–63.8) | 73.1 (72.6–73.5) | 63.6 (63.1–64.1) |

*Abbreviations: AAMR, Age-Adjusted Mortality Rate; CI, Confidence Interval*

**Supplementary Table S5B. Annual Percent Change (APC) and Average APC (AAPC) in infectious and parasitic diseases from 1999-2023 – Stratified by Census Region**

| **APC** | | | | | | | | |
| --- | --- | --- | --- | --- | --- | --- | --- | --- |
| **Cohort** | **Segment** | **Lower Endpoint** | **Upper Endpoint** | **APC** | **Lower CI** | **Upper CI** | **Test Statistic (t)** | **Prob > |t|** |
| Northeast | 1 | 1999 | 2018 | -1.0471* | -1.2381 | -0.8559 | -11.5002 | < 0.000001 |
| Northeast | 2 | 2018 | 2021 | 6.4461 | -0.2015 | 13.5365 | 2.0438 | 0.056783 |
| Northeast | 3 | 2021 | 2023 | -7.0586* | -12.7371 | -1.0106 | -2.4497 | 0.025427 |
| Midwest | 1 | 1999 | 2018 | 0.3252* | 0.1556 | 0.495 | 4.0486 | 0.000835 |
| Midwest | 2 | 2018 | 2021 | 9.1488* | 3.6905 | 14.8944 | 3.6002 | 0.002208 |
| Midwest | 3 | 2021 | 2023 | -9.9327* | -14.344 | -5.2942 | -4.3952 | 0.000395 |
| South | 1 | 1999 | 2018 | -0.1722 | -0.4183 | 0.0745 | -1.4732 | 0.158969 |
| South | 2 | 2018 | 2021 | 9.2380* | 2.4224 | 16.5072 | 2.8937 | 0.010097 |
| South | 3 | 2021 | 2023 | -11.2995* | -16.7589 | -5.482 | -3.9824 | 0.000963 |
| West | 1 | 1999 | 2018 | 0.4438* | 0.3091 | 0.5786 | 6.9613 | 0.000002 |
| West | 2 | 2018 | 2021 | 7.2738* | 2.7833 | 11.9605 | 3.4643 | 0.002965 |
| West | 3 | 2021 | 2023 | -8.0847* | -11.6907 | -4.3313 | -4.444 | 0.000356 |
| **AAPC** | | | | | | | | |
| **Cohort** | **Range** | **Lower Endpoint** | **Upper Endpoint** | **AAPC** | **Lower CI** | **Upper CI** | **Test Statistic~** | **P-Value~** |
| Northeast | Full Range | 1999 | 2023 | -0.6603 | -1.5553 | 0.2428 | -1.4347 | 0.15136 |
| Midwest | Full Range | 1999 | 2023 | 0.4807 | -0.2423 | 1.2089 | 1.3014 | 0.193118 |
| South | Full Range | 1999 | 2023 | -0.0312 | -0.9402 | 0.8862 | -0.0669 | 0.946674 |
| West | Full Range | 1999 | 2023 | 0.5271 | -0.0678 | 1.1255 | 1.7359 | 0.082584 |

*Abbreviations: CI, confidence interval*

** Indicates that the APC/AAPC significantly differs from zero at the alpha = 0.05 level.*

**Supplementary Table S6: Age-Adjusted Mortality Rates per 100,000 for infectious and parasitic diseases in the United States from 1999–2020, stratified by States**

| **State** | **AAMR (95% CI)** |
| --- | --- |
|  | **1999-2020** |
| **Alabama** | 75.7 (75.2–76.2) |
| **Alaska** | 52.5 (51.1–54.0) |
| **Arizona** | 51.9 (51.5–52.3) |
| **Arkansas** | 75.1 (74.5–75.7) |
| **California** | 65.8 (65.6–65.9) |
| **Colorado** | 50.4 (49.9–50.8) |
| **Connecticut** | 63.8 (63.3–64.3) |
| **Delaware** | 71.2 (70.0–72.3) |
| **District of Columbia** | 134.7 (132.7–136.7) |
| **Florida** | 57.0 (56.8–57.2) |
| **Georgia** | 75.3 (74.9–75.7) |
| **Hawaii** | 47.0 (46.3–47.8) |
| **Idaho** | 44.2 (43.5–44.9) |
| **Illinois** | 65.8 (65.5–66.1) |
| **Indiana** | 65.7 (65.2–66.1) |
| **Iowa** | 46.3 (45.9–46.8) |
| **Kansas** | 53.4 (52.8–53.9) |
| **Kentucky** | 81.3 (80.7–81.8) |
| **Louisiana** | 86.7 (86.1–87.3) |
| **Maine** | 47.4 (46.6–48.1) |
| **Maryland** | 80.4 (79.9–80.9) |
| **Massachusetts** | 60.2 (59.8–60.5) |
| **Michigan** | 61.8 (61.5–62.1) |
| **Minnesota** | 40.2 (39.8–40.5) |
| **Mississippi** | 86.7 (86.0–87.4) |
| **Missouri** | 61.1 (60.7–61.5) |
| **Montana** | 45.0 (44.2–45.8) |
| **Nebraska** | 46.8 (46.2–47.5) |
| **Nevada** | 69.2 (68.5–69.9) |
| **New Hampshire** | 47.7 (47.0–48.5) |
| **New Jersey** | 82.8 (82.5–83.2) |
| **New Mexico** | 61.4 (60.6–62.1) |
| **New York** | 64.1 (63.8–64.3) |
| **North Carolina** | 72.3 (71.9–72.6) |
| **North Dakota** | 45.5 (44.5–46.5) |
| **Ohio** | 66.7 (66.4–67.0) |
| **Oklahoma** | 79.4 (78.8–79.9) |
| **Oregon** | 48.9 (48.4–49.3) |
| **Pennsylvania** | 65.3 (65.1–65.6) |
| **Rhode Island** | 70.8 (69.9–71.8) |
| **South Carolina** | 80.8 (80.3–81.4) |
| **South Dakota** | 50.1 (49.2–51.1) |
| **Tennessee** | 78.4 (78.0–78.9) |
| **Texas** | 79.5 (79.2–79.7) |
| **Utah** | 47.0 (46.3–47.6) |
| **Vermont** | 47.9 (46.8–49.0) |
| **Virginia** | 66.2 (65.8–66.6) |
| **Washington** | 56.2 (55.8–56.6) |
| **West Virginia** | 80.2 (79.4–81.0) |
| **Wisconsin** | 44.2 (43.9–44.6) |
| **Wyoming** | 50.8 (49.5–52.0) |

*Abbreviations: AAMR, Age-Adjusted Mortality Rate; CI, Confidence Interval*

**Supplementary Table S7: Mortality by place of death for infectious and parasitic diseases in the U.S from 1999-2023**

| **Place of Death** | **Deaths (1999-2020)** | **Deaths (2021-2023)** | **Total** | **Total Percentage of Deaths** |
| --- | --- | --- | --- | --- |
| **Medical Facility - Inpatient** | 3613263 | 701646 | 4,314,909 | 75.20% |
| **Medical Facility - Outpatient or ER** | 155844 | 34041 | 189,885 | 3.30% |
| **Medical Facility - Dead on Arrival** | 6908 | 550 | 7,458 | 0.10% |
| **Medical Facility - Status unknown** | 5307 | * | 5,307 | 0.10% |
| **Decedent's home** | 330170 | 77472 | 407,642 | 7.10% |
| **Hospice facility** | 167463 | 51744 | 219,207 | 3.80% |
| **Nursing home/long term care** | 435199 | 49652 | 484,851 | 8.50% |
| **Other** | 81023 | 14696 | 95,719 | 1.70% |
| **Place of death unknown** | 15254 | 50 | 15,304 | 0.30% |
|  | **4810431** | 929,851 | 5,740,282 | 100% |
